# Supplementary material
Source: publisher figshare collection journal article supplement (https://acs.figshare.com/ndownloader/files/5143000)
Supplement: Supplementary file 1 [file 5143000]

data_global

_publ_contact_author_name             ' Masatoshi Kanesato '
_publ_contact_author_address
;
    AIST, Tsukuba Central 4, 1-1-1 Higashi, Tsukuba, Ibaraki 305-8562, Japan
;
_publ_contact_author_email            ' m.kanesato@aist.go.jp '
_publ_contact_author_fax              ' +81-29-861-3029 '
_publ_contact_author_phone            ' +81-29-861-3022 '

loop_
_publ_author_name
' Shin Mizukami '
' Hirohiko Houjou '
' Takeshi Sasaki '
' Masatoshi Kanesato '

_journal_name_full   ' Chemistry of materials '

data_2
#==============================================================================
_chemical_name_systematic
;
    ?
;
_chemical_name_common
;
    A dizinc complex of tBu-salen with methanol
;

_chemical_formula_sum                  'C49 H64 N4 O5 Zn2 '
_chemical_formula_moiety               'C49 H64 N4 O5 Zn2 '
_chemical_formula_weight               919.83
_chemical_melting_point                ' not measured '

#==============================================================================
_symmetry_cell_setting                 triclinic
_symmetry_space_group_name_H-M        'P -1       '
_symmetry_Int_Tables_number            2
loop_
_symmetry_equiv_pos_as_xyz
 'x,y,z'
 '-x,-y,-z'

#------------------------------------------------------------------------------

_cell_length_a                         12.50(2)
_cell_length_b                         14.17(1)
_cell_length_c                         15.80(2)
_cell_angle_alpha                      62.01(9)
_cell_angle_beta                       82.3(1)
_cell_angle_gamma                      76.7(1)
_cell_volume                           2405.1(5)
_cell_formula_units_Z                  2
_cell_measurement_reflns_used          14006
_cell_measurement_theta_min            3.0
_cell_measurement_theta_max            27.5
_cell_measurement_temperature          193.1

#------------------------------------------------------------------------------

_exptl_crystal_description            'plate'
_exptl_crystal_colour                 'yellow'
_exptl_crystal_size_max                0.60
_exptl_crystal_size_mid                0.40
_exptl_crystal_size_min                0.20
_exptl_crystal_density_diffrn          1.270
_exptl_crystal_density_meas            ?
_exptl_crystal_density_method         'not measured'
_exptl_crystal_F_000                   972.00
_exptl_absorpt_coefficient_mu          1.045
_exptl_absorpt_correction_type         sphere
_exptl_absorpt_process_details         International_Tables

#==============================================================================

# EXPERIMENTAL DATA

_diffrn_radiation_type                'Mo K\a'
_diffrn_radiation_wavelength           0.7107
_diffrn_measurement_device_type       'Rigaku RAXIS-RAPID'
_diffrn_reflns_number                  20606
_diffrn_reflns_av_R_equivalents        0.064
_diffrn_reflns_theta_max               27.49
_diffrn_measured_fraction_theta_max    0.9235
_diffrn_reflns_theta_full              27.49
_diffrn_measured_fraction_theta_full   0.9235
_diffrn_reflns_limit_h_min             -16
_diffrn_reflns_limit_h_max             15
_diffrn_reflns_limit_k_min             -16
_diffrn_reflns_limit_k_max             18
_diffrn_reflns_limit_l_min             -20
_diffrn_reflns_limit_l_max             20

#==============================================================================

# REFINEMENT DATA

_refine_special_details
;
    Refinement using reflections with F^2^ > 1.5 sigma(F^2^).
    The weighted R-factor (wR) and goodness of fit (S) are based on F^2^.
    R-factor (gt) are based on F. The threshold expression of
    F^2^ > 2.0 sigma(F^2^) is used only for calculating R-factor (gt).
;
_reflns_number_total                   10196
_reflns_number_gt                      5761
_reflns_threshold_expression           F^2^>2.0\s(F^2^)
_refine_ls_structure_factor_coef       Fsqd
_refine_ls_R_factor_gt                 0.0760
_refine_ls_wR_factor_ref               0.1850
_refine_ls_hydrogen_treatment          refall
_refine_ls_number_reflns               6406
_refine_ls_number_parameters           609
_refine_ls_goodness_of_fit_ref         1.142
_refine_ls_weighting_scheme            calc
_refine_ls_weighting_details
'w = 1/[0.0010Fo^2^ + 3.0000\s^2^(Fo) + 0.5000]/(4Fo^2^)'
_refine_ls_shift/su_max                0.0100
_refine_diff_density_max               1.43
_refine_diff_density_min               -1.24
_refine_ls_extinction_method           
   'Larson (1970) Crystallographic Computing eq. 22'
_refine_ls_extinction_coef             -26.8(2)

loop_
_atom_type_symbol
_atom_type_description
_atom_type_scat_dispersion_real
_atom_type_scat_dispersion_imag
_atom_type_scat_source
  'C' 'C'  0.003 0.002 
;
International Tables for Crystallography
(1992, Vol. C, Tables 4.2.6.8 and 6.1.1.4)
;
  'H' 'H'  0.000 0.000 
;
International Tables for Crystallography
(1992, Vol. C, Table 6.1.1.4)
;
  'N' 'N'  0.006 0.003 
;
International Tables for Crystallography
(1992, Vol. C, Tables 4.2.6.8 and 6.1.1.4)
;
  'O' 'O'  0.011 0.006 
;
International Tables for Crystallography
(1992, Vol. C, Tables 4.2.6.8 and 6.1.1.4)
;
  'Zn' 'Zn'  0.284 1.430 
;
International Tables for Crystallography
(1992, Vol. C, Tables 4.2.6.8 and 6.1.1.4)
;

#==============================================================================

# ATOMIC COORDINATES AND THERMAL PARAMETERS

loop_
_atom_site_label
_atom_site_type_symbol
_atom_site_fract_x
_atom_site_fract_y
_atom_site_fract_z
_atom_site_U_iso_or_equiv
_atom_site_adp_type
_atom_site_occupancy
_atom_site_symmetry_multiplicity
_atom_site_calc_flag
_atom_site_refinement_flags
_atom_site_disorder_assembly
_atom_site_disorder_group
 Zn1    Zn 0.16912(8)  0.17936(8)  0.35702(7)  0.0331(3)   Uani 1.00 1 d . . .
 Zn2    Zn -0.02022(8) 0.48578(8)  0.26543(7)  0.0348(3)   Uani 1.00 1 d . . .
 O1     O  0.2175(4)   0.0598(5)   0.4759(4)   0.036(2)    Uani 1.00 1 d . . .
 O2     O  0.0472(6)   0.6034(5)   0.1741(5)   0.052(2)    Uani 1.00 1 d . . .
 O3     O  0.2301(5)   0.1780(5)   0.2412(4)   0.042(2)    Uani 1.00 1 d . . .
 O4     O  -0.1686(5)  0.5168(5)   0.3090(4)   0.038(2)    Uani 1.00 1 d . . .
 O5     O  0.1484(9)   0.3131(7)   0.6508(7)   0.098(4)    Uani 1.00 1 d . . .
 N1     N  0.0085(7)   0.1891(5)   0.3885(6)   0.043(2)    Uani 1.00 1 d . . .
 N2     N  0.0095(5)   0.3977(5)   0.1939(4)   0.028(2)    Uani 1.00 1 d . . .
 N3     N  0.2430(5)   0.2964(5)   0.3464(4)   0.027(2)    Uani 1.00 1 d . . .
 N4     N  0.0422(5)   0.4294(5)   0.3938(5)   0.030(2)    Uani 1.00 1 d . . .
 C1     C  -0.0789(8)  0.2495(8)   0.3184(7)   0.050(3)    Uani 1.00 1 d . . .
 C2     C  -0.0402(9)  0.3016(8)   0.2173(8)   0.056(3)    Uani 1.00 1 d . . .
 C3     C  0.2346(8)   0.3242(7)   0.4268(7)   0.044(3)    Uani 1.00 1 d . . .
 C4     C  0.1540(7)   0.4296(7)   0.4095(7)   0.040(3)    Uani 1.00 1 d . . .
 C5     C  -0.0196(8)  0.1388(7)   0.4747(7)   0.036(3)    Uani 1.00 1 d . . .
 C6     C  0.0410(7)   0.0709(7)   0.5638(6)   0.034(3)    Uani 1.00 1 d . . .
 C7     C  0.1600(6)   0.0388(6)   0.5568(5)   0.027(2)    Uani 1.00 1 d . . .
 C8     C  0.2155(8)   -0.0235(7)  0.6475(7)   0.040(3)    Uani 1.00 1 d . . .
 C9     C  0.1524(8)   -0.0494(7)  0.7318(7)   0.047(3)    Uani 1.00 1 d . . .
 C10    C  0.0372(7)   -0.0213(7)  0.7359(6)   0.037(2)    Uani 1.00 1 d . . .
 C11    C  -0.0156(8)  0.0389(8)   0.6518(8)   0.050(3)    Uani 1.00 1 d . . .
 C12    C  0.3422(7)   -0.0578(7)  0.6471(6)   0.044(3)    Uani 1.00 1 d . . .
 C13    C  0.3963(7)   0.0415(8)   0.5914(7)   0.051(3)    Uani 1.00 1 d . . .
 C14    C  0.3786(9)   -0.1351(8)  0.6011(9)   0.070(4)    Uani 1.00 1 d . . .
 C15    C  0.3844(9)   -0.117(1)   0.7511(8)   0.082(4)    Uani 1.00 1 d . . .
 C16    C  0.0740(6)   0.4300(6)   0.1163(5)   0.028(2)    Uani 1.00 1 d . . .
 C17    C  0.1266(8)   0.5192(7)   0.0753(6)   0.038(3)    Uani 1.00 1 d . . .
 C18    C  0.1115(7)   0.6005(7)   0.1064(6)   0.030(2)    Uani 1.00 1 d . . .
 C19    C  0.1755(6)   0.6874(7)   0.0547(5)   0.028(2)    Uani 1.00 1 d . . .
 C20    C  0.2480(7)   0.6854(7)   -0.0208(5)  0.035(2)    Uani 1.00 1 d . . .
 C21    C  0.2587(7)   0.6050(7)   -0.0487(6)  0.034(2)    Uani 1.00 1 d . . .
 C22    C  0.1989(7)   0.5227(7)   -0.0011(6)  0.037(3)    Uani 1.00 1 d . . .
 C23    C  0.1635(8)   0.7802(7)   0.0815(6)   0.037(3)    Uani 1.00 1 d . . .
 C24    C  0.190(1)    0.7346(9)   0.1875(8)   0.076(4)    Uani 1.00 1 d . . .
 C25    C  0.043(1)    0.8431(9)   0.066(1)    0.086(5)    Uani 1.00 1 d . . .
 C26    C  0.2382(9)   0.8640(9)   0.0178(8)   0.063(4)    Uani 1.00 1 d . . .
 C27    C  0.3142(6)   0.3362(7)   0.2754(6)   0.029(2)    Uani 1.00 1 d . . .
 C28    C  0.3406(7)   0.3120(7)   0.1986(7)   0.041(3)    Uani 1.00 1 d . . .
 C29    C  0.3031(6)   0.2332(6)   0.1839(6)   0.028(2)    Uani 1.00 1 d . . .
 C30    C  0.3495(7)   0.2155(7)   0.1005(6)   0.034(2)    Uani 1.00 1 d . . .
 C31    C  0.4236(7)   0.2764(7)   0.0399(6)   0.039(3)    Uani 1.00 1 d . . .
 C32    C  0.4597(7)   0.3544(8)   0.0538(7)   0.042(3)    Uani 1.00 1 d . . .
 C33    C  0.4173(7)   0.3702(7)   0.1336(6)   0.034(2)    Uani 1.00 1 d . . .
 C34    C  0.3151(8)   0.1268(8)   0.0846(7)   0.047(3)    Uani 1.00 1 d . . .
 C35    C  0.1915(8)   0.154(1)    0.0699(9)   0.064(4)    Uani 1.00 1 d . . .
 C36    C  0.346(1)    0.0150(8)   0.1736(8)   0.069(4)    Uani 1.00 1 d . . .
 C37    C  0.3731(9)   0.118(1)    -0.0018(8)  0.066(4)    Uani 1.00 1 d . . .
 C38    C  -0.0197(7)  0.3945(7)   0.4694(6)   0.033(2)    Uani 1.00 1 d . . .
 C39    C  -0.1352(8)  0.3872(7)   0.4749(7)   0.039(3)    Uani 1.00 1 d . . .
 C40    C  -0.2048(7)  0.4506(6)   0.3921(5)   0.029(2)    Uani 1.00 1 d . . .
 C41    C  -0.3207(7)  0.4385(7)   0.4087(6)   0.035(3)    Uani 1.00 1 d . . .
 C42    C  -0.3530(9)  0.3648(8)   0.4978(8)   0.055(3)    Uani 1.00 1 d . . .
 C43    C  -0.2841(8)  0.3055(8)   0.5757(7)   0.048(3)    Uani 1.00 1 d . . .
 C44    C  -0.1769(8)  0.3206(7)   0.5617(6)   0.040(3)    Uani 1.00 1 d . . .
 C45    C  -0.3990(8)  0.5061(8)   0.3238(8)   0.049(3)    Uani 1.00 1 d . . .
 C46    C  -0.3577(8)  0.4813(8)   0.2379(6)   0.044(3)    Uani 1.00 1 d . . .
 C47    C  -0.4075(9)  0.6272(8)   0.2915(7)   0.054(3)    Uani 1.00 1 d . . .
 C48    C  -0.5139(8)  0.4793(9)   0.3525(8)   0.060(4)    Uani 1.00 1 d . . .
 C49    C  0.176(1)    0.212(1)    0.718(1)    0.108(6)    Uani 1.00 1 d . . .
 H1     H  0.4524(7)   0.2635(7)   -0.0133(6)  0.046(3)    Uiso 1.00 1 c . . .
 H2     H  0.5101(7)   0.3962(8)   0.0095(7)   0.047(3)    Uiso 1.00 1 c . . .
 H3     H  0.4413(7)   0.4220(7)   0.1450(6)   0.040(3)    Uiso 1.00 1 c . . .
 H4     H  -0.1301(8)  0.2837(7)   0.6149(6)   0.047(3)    Uiso 1.00 1 c . . .
 H5     H  -0.3099(8)  0.2557(8)   0.6361(7)   0.055(4)    Uiso 1.00 1 c . . .
 H6     H  -0.4267(9)  0.3541(8)   0.5064(8)   0.073(4)    Uiso 1.00 1 c . . .
 H7     H  0.2071(7)   0.4674(7)   -0.0207(6)  0.045(3)    Uiso 1.00 1 c . . .
 H8     H  0.3073(7)   0.6064(7)   -0.1008(6)  0.041(3)    Uiso 1.00 1 c . . .
 H9     H  0.2906(7)   0.7407(7)   -0.0525(5)  0.037(3)    Uiso 1.00 1 c . . .
 H10    H  -0.0935(8)  0.0589(8)   0.6530(8)   0.063(4)    Uiso 1.00 1 c . . .
 H11    H  -0.0026(7)  -0.0435(7)  0.7955(6)   0.041(3)    Uiso 1.00 1 c . . .
 H12    H  0.1896(8)   -0.0885(7)  0.7907(7)   0.055(4)    Uiso 1.00 1 c . . .
 H13    H  -0.0971(8)  0.1454(7)   0.4845(7)   0.044(3)    Uiso 1.00 1 c . . .
 H14    H  0.0872(6)   0.3856(6)   0.0845(5)   0.034(3)    Uiso 1.00 1 c . . .
 H15    H  0.3510(6)   0.3866(7)   0.2773(6)   0.035(3)    Uiso 1.00 1 c . . .
 H16    H  0.0134(7)   0.3710(7)   0.5285(6)   0.040(3)    Uiso 1.00 1 c . . .
 H17    H  0.2095(8)   0.2672(7)   0.4825(7)   0.055(4)    Uiso 1.00 1 c . . .
 H18    H  0.3054(8)   0.3301(7)   0.4372(7)   0.056(4)    Uiso 1.00 1 c . . .
 H19    H  0.1792(7)   0.4861(7)   0.3533(7)   0.051(3)    Uiso 1.00 1 c . . .
 H20    H  0.1535(7)   0.4442(7)   0.4624(7)   0.051(3)    Uiso 1.00 1 c . . .
 H21    H  -0.1007(9)  0.3254(8)   0.1770(8)   0.071(4)    Uiso 1.00 1 c . . .
 H22    H  0.0132(9)   0.2489(8)   0.2057(8)   0.071(4)    Uiso 1.00 1 c . . .
 H23    H  -0.1240(8)  0.2006(8)   0.3255(7)   0.065(4)    Uiso 1.00 1 c . . .
 H24    H  -0.1213(8)  0.3055(8)   0.3327(7)   0.065(4)    Uiso 1.00 1 c . . .
 H25    H  0.4502(9)   0.099(1)    0.0069(8)   0.087(6)    Uiso 1.00 1 c . . .
 H26    H  0.3501(9)   0.065(1)    -0.0114(8)  0.087(6)    Uiso 1.00 1 c . . .
 H27    H  0.3558(9)   0.187(1)    -0.0562(8)  0.087(6)    Uiso 1.00 1 c . . .
 H28    H  0.1748(8)   0.222(1)    0.0150(9)   0.092(6)    Uiso 1.00 1 c . . .
 H29    H  0.1695(8)   0.100(1)    0.0604(9)   0.092(6)    Uiso 1.00 1 c . . .
 H30    H  0.1532(8)   0.158(1)    0.1245(9)   0.092(6)    Uiso 1.00 1 c . . .
 H31    H  0.309(1)    0.0188(8)   0.2287(8)   0.083(5)    Uiso 1.00 1 c . . .
 H32    H  0.326(1)    -0.0407(8)  0.1655(8)   0.083(5)    Uiso 1.00 1 c . . .
 H33    H  0.423(1)    -0.0008(8)  0.1815(8)   0.083(5)    Uiso 1.00 1 c . . .
 H34    H  -0.5422(8)  0.4941(9)   0.4048(8)   0.075(5)    Uiso 1.00 1 c . . .
 H35    H  -0.5611(8)  0.5223(9)   0.2999(8)   0.075(5)    Uiso 1.00 1 c . . .
 H36    H  -0.5096(8)  0.4044(9)   0.3710(8)   0.075(5)    Uiso 1.00 1 c . . .
 H37    H  -0.3552(8)  0.4066(8)   0.2569(6)   0.053(4)    Uiso 1.00 1 c . . .
 H38    H  -0.4062(8)  0.5250(8)   0.1863(6)   0.053(4)    Uiso 1.00 1 c . . .
 H39    H  -0.2861(8)  0.4973(8)   0.2179(6)   0.053(4)    Uiso 1.00 1 c . . .
 H40    H  -0.3367(9)  0.6455(8)   0.2731(7)   0.062(4)    Uiso 1.00 1 c . . .
 H41    H  -0.4545(9)  0.6682(8)   0.2384(7)   0.062(4)    Uiso 1.00 1 c . . .
 H42    H  -0.4372(9)  0.6434(8)   0.3428(7)   0.062(4)    Uiso 1.00 1 c . . .
 H43    H  0.142(1)    0.6867(9)   0.2271(8)   0.099(6)    Uiso 1.00 1 c . . .
 H44    H  0.264(1)    0.6958(9)   0.1967(8)   0.099(6)    Uiso 1.00 1 c . . .
 H45    H  0.182(1)    0.7924(9)   0.2039(8)   0.099(6)    Uiso 1.00 1 c . . .
 H46    H  0.033(1)    0.9011(9)   0.083(1)    0.110(6)    Uiso 1.00 1 c . . .
 H47    H  0.025(1)    0.8716(9)   0.001(1)    0.110(6)    Uiso 1.00 1 c . . .
 H48    H  -0.004(1)   0.7939(9)   0.106(1)    0.110(6)    Uiso 1.00 1 c . . .
 H49    H  0.3131(9)   0.8284(9)   0.0264(8)   0.082(5)    Uiso 1.00 1 c . . .
 H50    H  0.2210(9)   0.8935(9)   -0.0477(8)  0.082(5)    Uiso 1.00 1 c . . .
 H51    H  0.2261(9)   0.9209(9)   0.0358(8)   0.082(5)    Uiso 1.00 1 c . . .
 H52    H  0.3518(9)   -0.179(1)   0.7873(8)   0.078(4)    Uiso 1.00 1 c . . .
 H53    H  0.4621(9)   -0.139(1)   0.7505(8)   0.078(4)    Uiso 1.00 1 c . . .
 H54    H  0.3641(9)   -0.069(1)   0.7795(8)   0.077(4)    Uiso 1.00 1 c . . .
 H55    H  0.3457(9)   -0.1974(8)  0.6355(9)   0.073(4)    Uiso 1.00 1 c . . .
 H56    H  0.3560(9)   -0.0980(8)  0.5366(9)   0.073(4)    Uiso 1.00 1 c . . .
 H57    H  0.4564(9)   -0.1571(8)  0.6024(9)   0.073(4)    Uiso 1.00 1 c . . .
 H58    H  0.4740(7)   0.0191(8)   0.5928(7)   0.053(3)    Uiso 1.00 1 c . . .
 H59    H  0.3738(7)   0.0780(8)   0.5269(7)   0.053(3)    Uiso 1.00 1 c . . .
 H60    H  0.3745(7)   0.0895(8)   0.6197(7)   0.053(3)    Uiso 1.00 1 c . . .
 H61    H  0.117(1)    0.175(1)    0.730(1)    0.132(8)    Uiso 1.00 1 c . . .
 H62    H  0.240(1)    0.177(1)    0.697(1)    0.132(8)    Uiso 1.00 1 c . . .
 H63    H  0.191(1)    0.212(1)    0.775(1)    0.132(8)    Uiso 1.00 1 c . . .
 H64    H  0.139(6)    0.348(6)    0.697(5)    0.02(2)     Uiso 1.00 1 c . . .


loop_
_atom_site_aniso_label
_atom_site_aniso_U_11
_atom_site_aniso_U_22
_atom_site_aniso_U_33
_atom_site_aniso_U_12
_atom_site_aniso_U_13
_atom_site_aniso_U_23
 Zn1    0.0332(6)   0.0320(6)   0.0326(6)   -0.0092(5)  -0.0027(5)  -0.0118(5) 
 Zn2    0.0378(7)   0.0355(6)   0.0344(6)   -0.0090(5)  0.0003(5)   -0.0181(5) 
 O1     0.025(3)    0.040(3)    0.031(3)    -0.007(3)   0.010(3)    -0.009(3)  
 O2     0.067(5)    0.035(4)    0.063(5)    -0.005(3)   -0.011(4)   -0.030(3)  
 O3     0.045(4)    0.033(3)    0.056(4)    -0.013(3)   -0.009(3)   -0.023(3)  
 O4     0.043(4)    0.033(3)    0.037(4)    0.002(3)    -0.014(3)   -0.015(3)  
 O5     0.17(1)     0.055(5)    0.087(7)    -0.025(6)   -0.058(6)   -0.033(5)  
 N1     0.060(5)    0.013(3)    0.059(5)    0.002(3)    -0.037(4)   -0.015(4)  
 N2     0.026(4)    0.036(4)    0.016(3)    -0.018(3)   0.014(3)    -0.004(3)  
 N3     0.021(4)    0.034(4)    0.020(3)    -0.006(3)   0.013(3)    -0.011(3)  
 N4     0.028(4)    0.034(4)    0.025(4)    -0.006(3)   0.006(3)    -0.013(3)  
 C1     0.053(6)    0.038(5)    0.070(7)    0.010(5)    -0.044(5)   -0.031(5)  
 C2     0.069(7)    0.039(6)    0.069(7)    0.009(5)    -0.055(6)   -0.027(5)  
 C3     0.048(6)    0.036(5)    0.054(6)    0.007(4)    -0.030(5)   -0.026(5)  
 C4     0.041(6)    0.043(5)    0.043(6)    -0.004(4)   -0.007(4)   -0.025(5)  
 C5     0.035(5)    0.029(5)    0.046(6)    -0.004(4)   -0.005(4)   -0.021(5)  
 C6     0.042(6)    0.028(5)    0.036(5)    -0.007(4)   -0.008(4)   -0.017(4)  
 C7     0.024(4)    0.028(4)    0.023(4)    -0.013(4)   0.017(3)    -0.008(4)  
 C8     0.045(6)    0.026(4)    0.045(6)    -0.008(4)   -0.009(5)   -0.011(4)  
 C9     0.061(7)    0.030(5)    0.046(6)    -0.013(5)   -0.014(5)   -0.008(4)  
 C10    0.040(6)    0.040(5)    0.021(5)    -0.009(4)   0.017(4)    -0.010(4)  
 C11    0.044(6)    0.039(5)    0.075(8)    -0.002(5)   -0.019(6)   -0.031(5)  
 C12    0.033(5)    0.046(5)    0.028(5)    0.000(4)    0.009(4)    -0.001(4)  
 C13    0.029(5)    0.055(6)    0.048(6)    -0.016(5)   0.007(4)    -0.004(5)  
 C14    0.061(8)    0.040(6)    0.082(9)    0.016(5)    -0.020(6)   -0.012(6)  
 C15    0.049(7)    0.081(9)    0.064(8)    0.007(6)    -0.021(6)   0.006(7)   
 C16    0.033(5)    0.029(4)    0.022(4)    -0.002(4)   -0.006(4)   -0.012(3)  
 C17    0.047(6)    0.027(5)    0.043(6)    0.008(4)    -0.030(5)   -0.016(4)  
 C18    0.024(5)    0.041(5)    0.027(5)    0.003(4)    -0.004(4)   -0.020(4)  
 C19    0.023(4)    0.036(4)    0.020(4)    -0.014(4)   0.011(3)    -0.007(4)  
 C20    0.034(5)    0.043(5)    0.017(4)    -0.016(4)   0.012(4)    -0.004(4)  
 C21    0.031(5)    0.050(5)    0.021(4)    -0.013(4)   0.016(4)    -0.017(4)  
 C22    0.046(6)    0.034(5)    0.032(5)    0.002(4)    -0.014(4)   -0.016(4)  
 C23    0.059(6)    0.034(5)    0.020(4)    -0.027(5)   0.017(4)    -0.011(4)  
 C24    0.13(1)     0.060(7)    0.055(7)    -0.032(8)   -0.020(7)   -0.033(6)  
 C25    0.09(1)     0.049(7)    0.14(1)     0.012(7)    -0.036(9)   -0.059(8)  
 C26    0.081(9)    0.063(7)    0.062(7)    -0.047(7)   0.021(6)    -0.034(6)  
 C27    0.020(4)    0.037(5)    0.032(5)    -0.006(4)   -0.002(3)   -0.016(4)  
 C28    0.034(5)    0.034(5)    0.057(6)    0.010(4)    -0.033(5)   -0.022(5)  
 C29    0.017(4)    0.028(4)    0.031(5)    -0.007(3)   0.000(3)    -0.006(4)  
 C30    0.030(5)    0.036(5)    0.029(5)    -0.009(4)   0.000(4)    -0.009(4)  
 C31    0.039(6)    0.043(5)    0.033(5)    -0.004(4)   -0.003(4)   -0.016(4)  
 C32    0.030(5)    0.049(6)    0.039(6)    -0.014(4)   0.000(4)    -0.012(5)  
 C33    0.032(5)    0.031(5)    0.036(5)    -0.021(4)   0.003(4)    -0.006(4)  
 C34    0.047(6)    0.053(6)    0.054(6)    -0.008(5)   -0.002(5)   -0.035(5)  
 C35    0.051(7)    0.089(9)    0.091(9)    -0.032(6)   0.009(6)    -0.068(8)  
 C36    0.10(1)     0.040(6)    0.069(8)    -0.031(6)   0.017(7)    -0.023(6)  
 C37    0.069(8)    0.082(8)    0.066(8)    -0.034(7)   0.033(6)    -0.051(7)  
 C38    0.040(5)    0.039(5)    0.020(4)    -0.005(4)   0.002(4)    -0.015(4)  
 C39    0.048(6)    0.027(5)    0.047(6)    -0.002(4)   -0.014(5)   -0.020(4)  
 C40    0.042(5)    0.031(4)    0.009(4)    -0.013(4)   0.011(4)    -0.006(3)  
 C41    0.033(5)    0.043(5)    0.035(5)    -0.012(4)   0.008(4)    -0.021(4)  
 C42    0.047(6)    0.059(7)    0.076(8)    -0.011(5)   -0.006(6)   -0.044(6)  
 C43    0.047(6)    0.062(6)    0.028(5)    -0.029(5)   0.025(5)    -0.014(5)  
 C44    0.058(6)    0.035(5)    0.025(5)    -0.010(5)   -0.001(4)   -0.011(4)  
 C45    0.047(6)    0.038(5)    0.070(7)    0.001(5)    -0.025(5)   -0.030(5)  
 C46    0.046(6)    0.057(6)    0.031(5)    -0.017(5)   0.009(4)    -0.021(5)  
 C47    0.055(7)    0.043(6)    0.056(7)    -0.003(5)   -0.016(5)   -0.017(5)  
 C48    0.044(6)    0.072(8)    0.072(8)    -0.011(6)   -0.011(5)   -0.038(6)  
 C49    0.16(2)     0.073(9)    0.10(1)     -0.05(1)    0.07(1)     -0.049(9)  

#==============================================================================

_computing_data_collection            'Unknown'
_computing_cell_refinement            'Unknown'
_computing_data_reduction             'CrystalStructure'
_computing_structure_solution         'DirectMethod'
_computing_structure_refinement       'CRYSTALS'
_computing_publication_material       'CrystalStructure Ver. 3.10'
_computing_molecular_graphics          ?

#==============================================================================

# MOLECULAR GEOMETRY

_geom_special_details
;
    ENTER SPECIAL DETAILS OF THE MOLECULAR GEOMETRY
;

loop_
 _geom_bond_atom_site_label_1
 _geom_bond_site_symmetry_1
 _geom_bond_atom_site_label_2
 _geom_bond_site_symmetry_2
 _geom_bond_distance
 _geom_bond_publ_flag
Zn1 . O1 . 1.900(6) yes
Zn1 . O3 . 1.893(7) yes
Zn1 . N1 . 1.992(9) yes
Zn1 . N3 . 2.009(7) yes
Zn2 . O2 . 1.907(7) yes
Zn2 . O4 . 1.916(7) yes
Zn2 . N2 . 1.992(7) yes
Zn2 . N4 . 1.995(7) yes
O1 . C7 . 1.317(9) yes
O2 . C18 . 1.26(1) yes
O3 . C29 . 1.307(9) yes
O4 . C40 . 1.301(9) yes
O5 . C49 . 1.318(15) yes
O5 . H64 . 1.0(1) no
N1 . C1 . 1.469(11) yes
N1 . C5 . 1.250(11) yes
N2 . C2 . 1.494(11) yes
N2 . C16 . 1.320(9) yes
N3 . C3 . 1.48(1) yes
N3 . C27 . 1.32(1) yes
N4 . C4 . 1.45(1) yes
N4 . C38 . 1.28(1) yes
C1 . C2 . 1.477(14) yes
C1 . H23 . 0.95(5) no
C1 . H24 . 0.95(6) no
C2 . H21 . 0.95(7) no
C2 . H22 . 0.95(6) no
C3 . C4 . 1.522(12) yes
C3 . H17 . 0.95(8) no
C3 . H18 . 0.95(2) no
C4 . H19 . 0.95(8) no
C4 . H20 . 0.95(2) no
C5 . C6 . 1.471(12) yes
C5 . H13 . 0.95(2) no
C6 . C7 . 1.457(12) yes
C6 . C11 . 1.389(13) yes
C7 . C8 . 1.454(12) yes
C8 . C9 . 1.386(13) yes
C8 . C12 . 1.546(13) yes
C9 . C10 . 1.404(13) yes
C9 . H12 . 0.95(7) no
C10 . C11 . 1.357(13) yes
C10 . H11 . 0.95(6) no
C11 . H10 . 0.95(4) no
C12 . C13 . 1.526(12) yes
C12 . C14 . 1.537(14) yes
C12 . C15 . 1.555(14) yes
C13 . H58 . 0.95(4) no
C13 . H59 . 0.95(6) no
C13 . H60 . 0.95(4) no
C14 . H55 . 0.95(7) no
C14 . H56 . 0.95(7) no
C14 . H57 . 0.95(4) no
C15 . H52 . 0.95(7) no
C15 . H53 . 0.95(4) no
C15 . H54 . 0.95(4) no
C16 . C17 . 1.396(11) yes
C16 . H14 . 0.95(3) no
C17 . C18 . 1.418(11) yes
C17 . C22 . 1.396(13) yes
C18 . C19 . 1.470(11) yes
C19 . C20 . 1.40(1) yes
C19 . C23 . 1.533(11) yes
C20 . C21 . 1.377(12) yes
C20 . H9 . 0.95(7) no
C21 . C22 . 1.384(11) yes
C21 . H8 . 0.95(6) no
C22 . H7 . 0.95(3) no
C23 . C24 . 1.538(13) yes
C23 . C25 . 1.552(15) yes
C23 . C26 . 1.559(12) yes
C24 . H43 . 0.95(8) no
C24 . H44 . 0.95(7) no
C24 . H45 . 0.95(3) no
C25 . H46 . 0.95(3) no
C25 . H47 . 0.95(6) no
C25 . H48 . 0.95(8) no
C26 . H49 . 0.95(6) no
C26 . H50 . 0.95(5) no
C26 . H51 . 0.95(3) no
C27 . C28 . 1.387(12) yes
C27 . H15 . 0.95(4) no
C28 . C29 . 1.428(11) yes
C28 . C33 . 1.400(12) yes
C29 . C30 . 1.474(12) yes
C30 . C31 . 1.369(11) yes
C30 . C34 . 1.551(12) yes
C31 . C32 . 1.399(12) yes
C31 . H1 . 0.95(4) no
C32 . C33 . 1.397(12) yes
C32 . H2 . 0.95(8) no
C33 . H3 . 0.95(3) no
C34 . C35 . 1.527(13) yes
C34 . C36 . 1.551(14) yes
C34 . C37 . 1.500(13) yes
C35 . H28 . 0.95(9) no
C35 . H29 . 0.95(3) no
C35 . H30 . 0.95(5) no
C36 . H31 . 0.95(5) no
C36 . H32 . 0.95(3) no
C36 . H33 . 0.95(4) no
C37 . H25 . 0.95(4) no
C37 . H26 . 0.95(3) no
C37 . H27 . 0.95(8) no
C38 . C39 . 1.460(12) yes
C38 . H16 . 0.95(5) no
C39 . C40 . 1.456(12) yes
C39 . C44 . 1.365(12) yes
C40 . C41 . 1.473(11) yes
C41 . C42 . 1.377(13) yes
C41 . C45 . 1.546(13) yes
C42 . C43 . 1.395(14) yes
C42 . H6 . 0.95(3) no
C43 . C44 . 1.377(12) yes
C43 . H5 . 0.95(8) no
C44 . H4 . 0.95(8) no
C45 . C46 . 1.553(13) yes
C45 . C47 . 1.524(13) yes
C45 . C48 . 1.525(13) yes
C46 . H37 . 0.95(4) no
C46 . H38 . 0.95(8) no
C46 . H39 . 0.95(4) no
C47 . H40 . 0.95(4) no
C47 . H41 . 0.95(8) no
C47 . H42 . 0.95(4) no
C48 . H34 . 0.95(4) no
C48 . H35 . 0.95(8) no
C48 . H36 . 0.95(4) no
C49 . H61 . 0.95(6) no
C49 . H62 . 0.95(7) no
C49 . H63 . 0.95(3) no

loop_
 _geom_angle_atom_site_label_1
 _geom_angle_site_symmetry_1
 _geom_angle_atom_site_label_2
 _geom_angle_site_symmetry_2
 _geom_angle_atom_site_label_3
 _geom_angle_site_symmetry_3
 _geom_angle
 _geom_angle_publ_flag
O1 . Zn1 . O3 . 119.4(3) yes
O1 . Zn1 . N1 . 96.8(3) yes
O3 . Zn1 . N1 . 121.8(3) yes
O1 . Zn1 . N3 . 103.4(3) yes
O3 . Zn1 . N3 . 96.1(3) yes
N1 . Zn1 . N3 . 119.4(3) yes
O2 . Zn2 . O4 . 119.1(3) yes
O2 . Zn2 . N2 . 97.2(3) yes
O4 . Zn2 . N2 . 117.5(3) yes
O2 . Zn2 . N4 . 109.2(3) yes
O4 . Zn2 . N4 . 93.8(3) yes
N2 . Zn2 . N4 . 121.6(3) yes
Zn1 . O1 . C7 . 122.7(5) yes
Zn2 . O2 . C18 . 124.7(5) yes
Zn1 . O3 . C29 . 127.0(5) yes
Zn2 . O4 . C40 . 121.1(6) yes
C49 . O5 . H64 . 94.9(5) no
Zn1 . N1 . C1 . 125.1(7) yes
Zn1 . N1 . C5 . 117.1(6) yes
C1 . N1 . C5 . 117.7(9) yes
Zn2 . N2 . C2 . 125.6(6) yes
Zn2 . N2 . C16 . 117.5(5) yes
C2 . N2 . C16 . 116.8(7) yes
Zn1 . N3 . C3 . 120.4(5) yes
Zn1 . N3 . C27 . 120.1(5) yes
C3 . N3 . C27 . 118.5(7) yes
Zn2 . N4 . C4 . 124.7(5) yes
Zn2 . N4 . C38 . 119.7(6) yes
C4 . N4 . C38 . 115.6(7) yes
N1 . C1 . C2 . 115.1(9) yes
N1 . C1 . H23 . 108.2(1) no
C2 . C1 . H23 . 108.7(1) no
N1 . C1 . H24 . 107.9(1) no
C2 . C1 . H24 . 107.4(1) no
H23 . C1 . H24 . 109.5(1) no
N2 . C2 . C1 . 112.6(7) yes
N2 . C2 . H21 . 108.3(1) no
C1 . C2 . H21 . 109.0(1) no
N2 . C2 . H22 . 109.3(1) no
C1 . C2 . H22 . 108.1(1) no
H21 . C2 . H22 . 109.5(2) no
N3 . C3 . C4 . 113.2(7) yes
N3 . C3 . H17 . 108.2(1) no
C4 . C3 . H17 . 107.6(1) no
N3 . C3 . H18 . 109.0(1) no
C4 . C3 . H18 . 109.3(1) no
H17 . C3 . H18 . 109.5(1) no
N4 . C4 . C3 . 114.1(7) yes
N4 . C4 . H19 . 107.6(1) no
C3 . C4 . H19 . 107.2(1) no
N4 . C4 . H20 . 108.9(1) no
C3 . C4 . H20 . 109.5(1) no
H19 . C4 . H20 . 109.5(1) no
N1 . C5 . C6 . 134.0(9) yes
N1 . C5 . H13 . 112.8(1) no
C6 . C5 . H13 . 113.2(1) no
C5 . C6 . C7 . 118.4(8) yes
C5 . C6 . C11 . 119.8(9) yes
C7 . C6 . C11 . 121.8(8) yes
O1 . C7 . C6 . 124.8(8) yes
O1 . C7 . C8 . 119.6(7) yes
C6 . C7 . C8 . 115.6(7) yes
C7 . C8 . C9 . 118.4(8) yes
C7 . C8 . C12 . 119.3(8) yes
C9 . C8 . C12 . 122.3(8) yes
C8 . C9 . C10 . 124.4(9) yes
C8 . C9 . H12 . 117.8(1) no
C10 . C9 . H12 . 117.8(1) no
C9 . C10 . C11 . 117.8(8) yes
C9 . C10 . H11 . 121.2(1) no
C11 . C10 . H11 . 121.0(1) no
C6 . C11 . C10 . 121.9(9) yes
C6 . C11 . H10 . 118.9(1) no
C10 . C11 . H10 . 119.2(1) no
C8 . C12 . C13 . 110.9(8) yes
C8 . C12 . C14 . 110.2(8) yes
C13 . C12 . C14 . 109.0(8) yes
C8 . C12 . C15 . 110.6(8) yes
C13 . C12 . C15 . 107.4(9) yes
C14 . C12 . C15 . 108.8(9) yes
C12 . C13 . H58 . 109.7(1) no
C12 . C13 . H59 . 109.2(1) no
H58 . C13 . H59 . 109.5(1) no
C12 . C13 . H60 . 109.5(1) no
H58 . C13 . H60 . 109.5(1) no
H59 . C13 . H60 . 109.5(1) no
C12 . C14 . H55 . 109.7(1) no
C12 . C14 . H56 . 108.9(1) no
H55 . C14 . H56 . 109.5(2) no
C12 . C14 . H57 . 109.8(1) no
H55 . C14 . H57 . 109.5(2) no
H56 . C14 . H57 . 109.5(2) no
C12 . C15 . H52 . 108.9(1) no
C12 . C15 . H53 . 110.1(1) no
H52 . C15 . H53 . 109.5(2) no
C12 . C15 . H54 . 109.3(1) no
H52 . C15 . H54 . 109.5(2) no
H53 . C15 . H54 . 109.5(2) no
N2 . C16 . C17 . 129.1(8) yes
N2 . C16 . H14 . 115.2(9) no
C17 . C16 . H14 . 115.7(1) no
C16 . C17 . C18 . 125.0(9) yes
C16 . C17 . C22 . 114.0(7) yes
C18 . C17 . C22 . 121.0(8) yes
O2 . C18 . C17 . 124.7(8) yes
O2 . C18 . C19 . 118.4(7) yes
C17 . C18 . C19 . 116.9(8) yes
C18 . C19 . C20 . 119.3(7) yes
C18 . C19 . C23 . 120.9(7) yes
C20 . C19 . C23 . 119.8(7) yes
C19 . C20 . C21 . 121.5(7) yes
C19 . C20 . H9 . 118.7(1) no
C21 . C20 . H9 . 119.8(1) no
C20 . C21 . C22 . 120.0(7) yes
C20 . C21 . H8 . 119.7(1) no
C22 . C21 . H8 . 120.2(1) no
C17 . C22 . C21 . 121.3(8) yes
C17 . C22 . H7 . 119.3(1) no
C21 . C22 . H7 . 119.4(1) no
C19 . C23 . C24 . 110.4(7) yes
C19 . C23 . C25 . 108.5(7) yes
C24 . C23 . C25 . 108.6(9) yes
C19 . C23 . C26 . 112.8(7) yes
C24 . C23 . C26 . 109.2(8) yes
C25 . C23 . C26 . 107.1(9) yes
C23 . C24 . H43 . 109.8(1) no
C23 . C24 . H44 . 108.5(1) no
H43 . C24 . H44 . 109.5(2) no
C23 . C24 . H45 . 110.1(1) no
H43 . C24 . H45 . 109.5(2) no
H44 . C24 . H45 . 109.5(2) no
C23 . C25 . H46 . 110.2(2) no
C23 . C25 . H47 . 109.8(2) no
H46 . C25 . H47 . 109.5(2) no
C23 . C25 . H48 . 108.4(2) no
H46 . C25 . H48 . 109.5(2) no
H47 . C25 . H48 . 109.5(2) no
C23 . C26 . H49 . 109.3(1) no
C23 . C26 . H50 . 109.5(1) no
H49 . C26 . H50 . 109.5(2) no
C23 . C26 . H51 . 109.5(1) no
H49 . C26 . H51 . 109.5(2) no
H50 . C26 . H51 . 109.5(2) no
N3 . C27 . C28 . 126.9(8) yes
N3 . C27 . H15 . 116.1(1) no
C28 . C27 . H15 . 117.0(1) no
C27 . C28 . C29 . 127.3(9) yes
C27 . C28 . C33 . 113.1(8) yes
C29 . C28 . C33 . 119.5(8) yes
O3 . C29 . C28 . 122.2(8) yes
O3 . C29 . C30 . 120.2(7) yes
C28 . C29 . C30 . 117.6(7) yes
C29 . C30 . C31 . 119.2(8) yes
C29 . C30 . C34 . 119.2(7) yes
C31 . C30 . C34 . 121.5(8) yes
C30 . C31 . C32 . 123.2(9) yes
C30 . C31 . H1 . 117.6(1) no
C32 . C31 . H1 . 119.2(1) no
C31 . C32 . C33 . 117.8(8) yes
C31 . C32 . H2 . 120.9(1) no
C33 . C32 . H2 . 121.3(1) no
C28 . C33 . C32 . 122.6(8) yes
C28 . C33 . H3 . 118.0(1) no
C32 . C33 . H3 . 119.3(1) no
C30 . C34 . C35 . 110.0(8) yes
C30 . C34 . C36 . 108.9(8) yes
C35 . C34 . C36 . 110.0(9) yes
C30 . C34 . C37 . 111.7(8) yes
C35 . C34 . C37 . 108.1(9) yes
C36 . C34 . C37 . 108.1(9) yes
C34 . C35 . H28 . 108.3(1) no
C34 . C35 . H29 . 110.6(1) no
H28 . C35 . H29 . 109.5(2) no
C34 . C35 . H30 . 109.4(1) no
H28 . C35 . H30 . 109.5(2) no
H29 . C35 . H30 . 109.5(2) no
C34 . C36 . H31 . 109.1(1) no
C34 . C36 . H32 . 110.4(1) no
H31 . C36 . H32 . 109.5(2) no
C34 . C36 . H33 . 108.9(1) no
H31 . C36 . H33 . 109.5(2) no
H32 . C36 . H33 . 109.5(2) no
C34 . C37 . H25 . 109.3(1) no
C34 . C37 . H26 . 110.7(1) no
H25 . C37 . H26 . 109.5(2) no
C34 . C37 . H27 . 108.4(1) no
H25 . C37 . H27 . 109.5(2) no
H26 . C37 . H27 . 109.5(2) no
N4 . C38 . C39 . 127.4(8) yes
N4 . C38 . H16 . 116.3(1) no
C39 . C38 . H16 . 116.3(1) no
C38 . C39 . C40 . 121.7(8) yes
C38 . C39 . C44 . 117.5(8) yes
C40 . C39 . C44 . 120.8(9) yes
O4 . C40 . C39 . 122.5(8) yes
O4 . C40 . C41 . 121.5(8) yes
C39 . C40 . C41 . 116.0(7) yes
C40 . C41 . C42 . 118.5(8) yes
C40 . C41 . C45 . 118.2(8) yes
C42 . C41 . C45 . 123.3(8) yes
C41 . C42 . C43 . 123.9(9) yes
C41 . C42 . H6 . 117.8(1) no
C43 . C42 . H6 . 118.3(1) no
C42 . C43 . C44 . 117.7(8) yes
C42 . C43 . H5 . 121.1(1) no
C44 . C43 . H5 . 121.2(1) no
C39 . C44 . C43 . 123.0(9) yes
C39 . C44 . H4 . 118.4(1) no
C43 . C44 . H4 . 118.6(1) no
C41 . C45 . C46 . 111.2(8) yes
C41 . C45 . C47 . 109.9(7) yes
C46 . C45 . C47 . 109.1(9) yes
C41 . C45 . C48 . 111.0(8) yes
C46 . C45 . C48 . 107.0(7) yes
C47 . C45 . C48 . 108.6(8) yes
C45 . C46 . H37 . 109.5(1) no
C45 . C46 . H38 . 109.6(1) no
H37 . C46 . H38 . 109.5(1) no
C45 . C46 . H39 . 109.3(1) no
H37 . C46 . H39 . 109.5(1) no
H38 . C46 . H39 . 109.5(1) no
C45 . C47 . H40 . 109.8(1) no
C45 . C47 . H41 . 109.3(1) no
H40 . C47 . H41 . 109.5(1) no
C45 . C47 . H42 . 109.3(1) no
H40 . C47 . H42 . 109.5(1) no
H41 . C47 . H42 . 109.5(1) no
C45 . C48 . H34 . 109.4(1) no
C45 . C48 . H35 . 109.9(1) no
H34 . C48 . H35 . 109.5(2) no
C45 . C48 . H36 . 109.2(1) no
H34 . C48 . H36 . 109.5(2) no
H35 . C48 . H36 . 109.5(2) no
O5 . C49 . H61 . 109.5(2) no
O5 . C49 . H62 . 108.8(2) no
H61 . C49 . H62 . 109.5(2) no
O5 . C49 . H63 . 110.0(2) no
H61 . C49 . H63 . 109.5(2) no
H62 . C49 . H63 . 109.5(2) no

loop_
 _geom_torsion_atom_site_label_1
 _geom_torsion_site_symmetry_1
 _geom_torsion_atom_site_label_2
 _geom_torsion_site_symmetry_2
 _geom_torsion_atom_site_label_3
 _geom_torsion_site_symmetry_3
 _geom_torsion_atom_site_label_4
 _geom_torsion_site_symmetry_4
 _geom_torsion
 _geom_torsion_publ_flag
O3 . Zn1 . O1 . C7 . -160.1(6) yes
N1 . Zn1 . O1 . C7 . -27.5(8) yes
N3 . Zn1 . O1 . C7 . 94.9(7) yes
O1 . Zn1 . O3 . C29 . -104.1(8) yes
N1 . Zn1 . O3 . C29 . 135.2(8) yes
N3 . Zn1 . O3 . C29 . 4.9(8) yes
O1 . Zn1 . N1 . C1 . -164.6(8) yes
O1 . Zn1 . N1 . C5 . 14.6(8) yes
O3 . Zn1 . N1 . C1 . -33.7(1) yes
O3 . Zn1 . N1 . C5 . 145.6(8) yes
N3 . Zn1 . N1 . C1 . 85.8(9) yes
N3 . Zn1 . N1 . C5 . -94.9(9) yes
O1 . Zn1 . N3 . C3 . -50.8(7) yes
O1 . Zn1 . N3 . C27 . 117.7(7) yes
O3 . Zn1 . N3 . C3 . -172.9(6) yes
O3 . Zn1 . N3 . C27 . -4.4(7) yes
N1 . Zn1 . N3 . C3 . 55.1(9) yes
N1 . Zn1 . N3 . C27 . -136.4(7) yes
O4 . Zn2 . O2 . C18 . -142.2(7) yes
N2 . Zn2 . O2 . C18 . -15.2(9) yes
N4 . Zn2 . O2 . C18 . 111.9(8) yes
O2 . Zn2 . O4 . C40 . -154.6(7) yes
N2 . Zn2 . O4 . C40 . 88.7(8) yes
N4 . Zn2 . O4 . C40 . -40.1(7) yes
O2 . Zn2 . N2 . C2 . -168.1(7) yes
O2 . Zn2 . N2 . C16 . 8.2(7) yes
O4 . Zn2 . N2 . C2 . -40.0(9) yes
O4 . Zn2 . N2 . C16 . 136.3(6) yes
N4 . Zn2 . N2 . C2 . 74.1(9) yes
N4 . Zn2 . N2 . C16 . -109.6(7) yes
O2 . Zn2 . N4 . C4 . -31.6(9) yes
O2 . Zn2 . N4 . C38 . 144.9(7) yes
O4 . Zn2 . N4 . C4 . -154.2(7) yes
O4 . Zn2 . N4 . C38 . 22.3(8) yes
N2 . Zn2 . N4 . C4 . 80.0(8) yes
N2 . Zn2 . N4 . C38 . -103.4(8) yes
Zn1 . O1 . C7 . C6 . 25.6(1) yes
Zn1 . O1 . C7 . C8 . -156.3(6) yes
Zn2 . O2 . C18 . C17 . 13.4(1) yes
Zn2 . O2 . C18 . C19 . -167.0(5) yes
Zn1 . O3 . C29 . C28 . -5.6(1) yes
Zn1 . O3 . C29 . C30 . 174.5(5) yes
Zn2 . O4 . C40 . C39 . 33.6(1) yes
Zn2 . O4 . C40 . C41 . -148.5(6) yes
Zn1 . N1 . C1 . C2 . 2.8(1) yes
C5 . N1 . C1 . C2 . -176.4(1) yes
Zn1 . N1 . C5 . C6 . 0.8(1) yes
C1 . N1 . C5 . C6 . -179.9(1) yes
Zn2 . N2 . C2 . C1 . -22.9(1) yes
C16 . N2 . C2 . C1 . 160.8(9) yes
Zn2 . N2 . C16 . C17 . 0.1(1) yes
C2 . N2 . C16 . C17 . 176.7(1) yes
Zn1 . N3 . C3 . C4 . -103.7(7) yes
C27 . N3 . C3 . C4 . 87.7(1) yes
Zn1 . N3 . C27 . C28 . 5.3(1) yes
C3 . N3 . C27 . C28 . 174.0(9) yes
Zn2 . N4 . C4 . C3 . -93.9(8) yes
C38 . N4 . C4 . C3 . 89.5(1) yes
Zn2 . N4 . C38 . C39 . 1.9(1) yes
C4 . N4 . C38 . C39 . 178.8(9) yes
N1 . C1 . C2 . N2 . -71.7(1) yes
N3 . C3 . C4 . N4 . 59.1(9) yes
N1 . C5 . C6 . C7 . -9.9(2) yes
N1 . C5 . C6 . C11 . 170.3(1) yes
C5 . C6 . C7 . O1 . -4.8(1) yes
C5 . C6 . C7 . C8 . 177.0(8) yes
C11 . C6 . C7 . O1 . 174.9(9) yes
C11 . C6 . C7 . C8 . -3.3(1) yes
C5 . C6 . C11 . C10 . -178.2(1) yes
C7 . C6 . C11 . C10 . 2.1(2) yes
O1 . C7 . C8 . C9 . -176.6(8) yes
O1 . C7 . C8 . C12 . 3.8(1) yes
C6 . C7 . C8 . C9 . 1.7(1) yes
C6 . C7 . C8 . C12 . -177.9(8) yes
C7 . C8 . C9 . C10 . 1.2(1) yes
C12 . C8 . C9 . C10 . -179.2(9) yes
C7 . C8 . C12 . C13 . 57.4(1) yes
C7 . C8 . C12 . C14 . -63.3(1) yes
C7 . C8 . C12 . C15 . 176.4(8) yes
C9 . C8 . C12 . C13 . -122.1(1) yes
C9 . C8 . C12 . C14 . 117.1(1) yes
C9 . C8 . C12 . C15 . -3.1(1) yes
C8 . C9 . C10 . C11 . -2.6(2) yes
C9 . C10 . C11 . C6 . 0.9(2) yes
N2 . C16 . C17 . C18 . -6.2(2) yes
N2 . C16 . C17 . C22 . 173.2(8) yes
C16 . C17 . C18 . O2 . -1.2(2) yes
C16 . C17 . C18 . C19 . 179.2(8) yes
C22 . C17 . C18 . O2 . 179.4(9) yes
C22 . C17 . C18 . C19 . -0.2(1) yes
C16 . C17 . C22 . C21 . -179.1(9) yes
C18 . C17 . C22 . C21 . 0.3(1) yes
O2 . C18 . C19 . C20 . 179.7(8) yes
O2 . C18 . C19 . C23 . -0.8(1) yes
C17 . C18 . C19 . C20 . -0.7(1) yes
C17 . C18 . C19 . C23 . 178.9(8) yes
C18 . C19 . C20 . C21 . 1.4(1) yes
C23 . C19 . C20 . C21 . -178.2(9) yes
C18 . C19 . C23 . C24 . 57.8(1) yes
C18 . C19 . C23 . C25 . -61.2(1) yes
C18 . C19 . C23 . C26 . -179.7(8) yes
C20 . C19 . C23 . C24 . -122.7(1) yes
C20 . C19 . C23 . C25 . 118.3(1) yes
C20 . C19 . C23 . C26 . -0.2(1) yes
C19 . C20 . C21 . C22 . -1.2(1) yes
C20 . C21 . C22 . C17 . 0.4(1) yes
N3 . C27 . C28 . C29 . -5.3(2) yes
N3 . C27 . C28 . C33 . 178.3(8) yes
C27 . C28 . C29 . O3 . 5.1(1) yes
C27 . C28 . C29 . C30 . -175.1(9) yes
C33 . C28 . C29 . O3 . -178.7(8) yes
C33 . C28 . C29 . C30 . 1.2(1) yes
C27 . C28 . C33 . C32 . 176.6(9) yes
C29 . C28 . C33 . C32 . -0.2(1) yes
O3 . C29 . C30 . C31 . 178.2(8) yes
O3 . C29 . C30 . C34 . -3.0(1) yes
C28 . C29 . C30 . C31 . -1.7(1) yes
C28 . C29 . C30 . C34 . 177.1(9) yes
C29 . C30 . C31 . C32 . 1.1(1) yes
C34 . C30 . C31 . C32 . -177.6(9) yes
C29 . C30 . C34 . C35 . 61.6(1) yes
C29 . C30 . C34 . C36 . -59.0(1) yes
C29 . C30 . C34 . C37 . -178.3(9) yes
C31 . C30 . C34 . C35 . -119.6(1) yes
C31 . C30 . C34 . C36 . 119.8(1) yes
C31 . C30 . C34 . C37 . 0.4(1) yes
C30 . C31 . C32 . C33 . -0.1(2) yes
C31 . C32 . C33 . C28 . -0.4(1) yes
N4 . C38 . C39 . C40 . -19.9(1) yes
N4 . C38 . C39 . C44 . 161.8(9) yes
C38 . C39 . C40 . O4 . 0.2(1) yes
C38 . C39 . C40 . C41 . -177.8(8) yes
C44 . C39 . C40 . O4 . 178.4(9) yes
C44 . C39 . C40 . C41 . 0.4(1) yes
C38 . C39 . C44 . C43 . -179.0(9) yes
C40 . C39 . C44 . C43 . 2.8(2) yes
O4 . C40 . C41 . C42 . 178.3(8) yes
O4 . C40 . C41 . C45 . 0.5(1) yes
C39 . C40 . C41 . C42 . -3.7(1) yes
C39 . C40 . C41 . C45 . 178.5(9) yes
C40 . C41 . C42 . C43 . 4.3(2) yes
C45 . C41 . C42 . C43 . -178.0(1) yes
C40 . C41 . C45 . C46 . 58.3(1) yes
C40 . C41 . C45 . C47 . -62.6(1) yes
C40 . C41 . C45 . C48 . 177.3(8) yes
C42 . C41 . C45 . C46 . -119.3(1) yes
C42 . C41 . C45 . C47 . 119.8(1) yes
C42 . C41 . C45 . C48 . -0.4(2) yes
C41 . C42 . C43 . C44 . -1.3(2) yes
C42 . C43 . C44 . C39 . -2.4(2) yes

loop_
_geom_contact_atom_site_label_1
_geom_contact_site_symmetry_1
_geom_contact_atom_site_label_2
_geom_contact_site_symmetry_2
_geom_contact_distance
_geom_contact_publ_flag
Zn1 . O1 . 1.900(6) yes
Zn1 . O3 . 1.893(7) yes
Zn1 . N1 . 1.992(9) yes
Zn1 . N2 . 3.355(9) yes
Zn1 . N3 . 2.009(7) yes
Zn1 . C1 . 3.08(1) yes
Zn1 . C2 . 3.26(1) yes
Zn1 . C3 . 3.041(8) yes
Zn1 . C5 . 2.79(1) yes
Zn1 . C6 . 3.26(1) yes
Zn1 . C7 . 2.838(9) yes
Zn1 . C27 . 2.904(9) yes
Zn1 . C28 . 3.224(11) yes
Zn1 . C29 . 2.876(9) yes
Zn1 . H17 . 2.936(8) no
Zn1 . H22 . 2.94(1) no
Zn1 . H59 . 3.514(11) no
Zn2 . O2 . 1.907(7) yes
Zn2 . O4 . 1.916(7) yes
Zn2 . N2 . 1.992(7) yes
Zn2 . N4 . 1.995(7) yes
Zn2 . C1 . 3.28(1) yes
Zn2 . C2 . 3.109(9) yes
Zn2 . C4 . 3.07(1) yes
Zn2 . C16 . 2.853(8) yes
Zn2 . C17 . 3.194(11) yes
Zn2 . C18 . 2.821(9) yes
Zn2 . C38 . 2.856(9) yes
Zn2 . C39 . 3.207(11) yes
Zn2 . C40 . 2.817(9) yes
Zn2 . H19 . 3.015(9) no
Zn2 . H21 . 3.542(9) no
Zn2 . H24 . 2.80(1) no
Zn2 . H39 . 3.46(1) no
Zn2 . H64 2_566 2.75(7) no
O1 . O3 . 3.27(1) yes
O1 . N1 . 2.91(1) yes
O1 . N3 . 3.068(9) yes
O1 . C3 . 3.506(11) yes
O1 . C5 . 2.916(12) yes
O1 . C6 . 2.459(11) yes
O1 . C7 . 1.317(9) yes
O1 . C8 . 2.396(11) yes
O1 . C12 . 2.870(12) yes
O1 . C13 . 2.964(12) yes
O1 . C14 . 2.996(13) yes
O1 . H13 2_556 3.342(11) no
O1 . H17 . 2.97(1) no
O1 . H55 . 3.461(13) no
O1 . H56 . 2.359(12) no
O1 . H59 . 2.321(11) no
O1 . H60 . 3.417(12) no
O2 . O4 . 3.294(11) yes
O2 . N2 . 2.925(9) yes
O2 . N4 . 3.181(11) yes
O2 . C4 . 3.592(13) yes
O2 . C16 . 2.94(1) yes
O2 . C17 . 2.373(11) yes
O2 . C18 . 1.26(1) yes
O2 . C19 . 2.35(1) yes
O2 . C23 . 2.864(11) yes
O2 . C24 . 2.950(13) yes
O2 . C25 . 2.992(14) yes
O2 . H19 . 3.013(12) no
O2 . H43 . 2.311(12) no
O2 . H44 . 3.395(14) no
O2 . H47 . 3.458(15) no
O2 . H48 . 2.349(13) no
O2 . H64 2_566 3.06(7) no
O3 . N1 . 3.395(12) yes
O3 . N2 . 3.503(11) yes
O3 . N3 . 2.902(9) yes
O3 . C2 . 3.409(13) yes
O3 . C16 . 3.415(11) yes
O3 . C27 . 2.97(1) yes
O3 . C28 . 2.395(11) yes
O3 . C29 . 1.307(9) yes
O3 . C30 . 2.412(11) yes
O3 . C34 . 2.899(12) yes
O3 . C35 . 2.996(12) yes
O3 . C36 . 2.988(13) yes
O3 . H14 . 3.147(11) no
O3 . H22 . 2.702(12) no
O3 . H28 . 3.465(13) no
O3 . H30 . 2.344(12) no
O3 . H31 . 2.332(12) no
O3 . H33 . 3.455(14) no
O4 . O5 2_566 2.84(1) yes
O4 . N2 . 3.34(1) yes
O4 . N4 . 2.86(1) yes
O4 . C38 . 2.925(11) yes
O4 . C39 . 2.418(11) yes
O4 . C40 . 1.301(9) yes
O4 . C41 . 2.421(11) yes
O4 . C45 . 2.893(12) yes
O4 . C46 . 2.983(11) yes
O4 . C47 . 3.019(13) yes
O4 . H24 . 2.766(11) no
O4 . H37 . 3.460(11) no
O4 . H39 . 2.331(11) no
O4 . H40 . 2.377(12) no
O4 . H42 . 3.525(13) no
O4 . H63 2_566 3.375(15) no
O4 . H64 2_566 1.99(7) no
O5 . C3 . 3.500(14) yes
O5 . C4 . 3.368(14) yes
O5 . C38 . 3.370(13) yes
O5 . C40 2_566 3.317(11) yes
O5 . C49 . 1.318(15) yes
O5 . H16 . 2.451(12) no
O5 . H17 . 2.987(13) no
O5 . H20 . 2.671(14) no
O5 . H40 2_566 3.065(13) no
O5 . H61 . 1.865(14) no
O5 . H62 . 1.857(17) no
O5 . H63 . 1.870(18) no
O5 . H64 . 1.03(7) no
N1 . N2 . 3.110(11) yes
N1 . N3 . 3.454(11) yes
N1 . N4 . 3.567(9) yes
N1 . C1 . 1.469(11) yes
N1 . C2 . 2.486(13) yes
N1 . C5 . 1.250(11) yes
N1 . C6 . 2.506(12) yes
N1 . C6 2_556 3.585(11) yes
N1 . C7 . 3.062(12) yes
N1 . C11 2_556 3.555(11) yes
N1 . H13 . 1.840(12) no
N1 . H21 . 3.274(13) no
N1 . H22 . 2.598(13) no
N1 . H23 . 1.983(11) no
N1 . H24 . 1.979(11) no
N2 . N4 . 3.48(1) yes
N2 . C1 . 2.472(12) yes
N2 . C2 . 1.494(11) yes
N2 . C16 . 1.320(9) yes
N2 . C17 . 2.452(12) yes
N2 . C18 . 3.047(11) yes
N2 . H14 . 1.93(1) no
N2 . H21 . 2.007(11) no
N2 . H22 . 2.019(11) no
N2 . H23 . 3.268(13) no
N2 . H24 . 2.554(13) no
N3 . N4 . 3.01(1) yes
N3 . C3 . 1.48(1) yes
N3 . C4 . 2.508(11) yes
N3 . C27 . 1.32(1) yes
N3 . C28 . 2.422(12) yes
N3 . C29 . 3.048(11) yes
N3 . C33 . 3.596(11) yes
N3 . H15 . 1.93(1) no
N3 . H17 . 1.994(11) no
N3 . H18 . 2.00(1) no
N3 . H19 . 2.672(11) no
N3 . H20 . 3.312(11) no
N3 . H59 . 3.320(13) no
N4 . C3 . 2.497(12) yes
N4 . C4 . 1.45(1) yes
N4 . C38 . 1.28(1) yes
N4 . C39 . 2.459(12) yes
N4 . C40 . 3.035(12) yes
N4 . H16 . 1.90(1) no
N4 . H16 2_566 3.480(11) no
N4 . H17 . 2.678(12) no
N4 . H18 . 3.293(12) no
N4 . H19 . 1.962(11) no
N4 . H20 . 1.977(11) no
N4 . H24 . 3.461(11) no
N4 . H64 2_566 3.24(7) no
C1 . C2 . 1.477(14) yes
C1 . C5 . 2.330(14) yes
C1 . C40 . 3.537(13) yes
C1 . H13 . 2.340(14) no
C1 . H21 . 2.000(13) no
C1 . H22 . 1.989(15) no
C1 . H23 . 0.95(5) no
C1 . H24 . 0.95(6) no
C1 . H55 2_556 3.491(16) no
C2 . C16 . 2.399(14) yes
C2 . H14 . 2.448(14) no
C2 . H21 . 0.95(7) no
C2 . H22 . 0.95(6) no
C2 . H23 . 1.996(15) no
C2 . H24 . 1.981(15) no
C2 . H30 . 3.422(16) no
C3 . C4 . 1.522(12) yes
C3 . C27 . 2.408(13) yes
C3 . C38 . 3.185(13) yes
C3 . H15 . 2.487(13) no
C3 . H16 . 3.104(13) no
C3 . H17 . 0.95(8) no
C3 . H18 . 0.95(2) no
C3 . H19 . 2.019(13) no
C3 . H20 . 2.045(12) no
C3 . H36 1_655 3.504(14) no
C3 . H59 . 3.235(14) no
C3 . H60 . 3.557(14) no
C4 . C27 . 3.244(12) yes
C4 . C38 . 2.316(12) yes
C4 . H15 . 3.149(12) no
C4 . H16 . 2.375(13) no
C4 . H16 2_566 3.556(13) no
C4 . H17 . 2.024(13) no
C4 . H18 . 2.043(13) no
C4 . H19 . 0.95(8) no
C4 . H20 . 0.95(2) no
C4 . H43 . 3.407(15) no
C5 . C6 . 1.471(12) yes
C5 . C6 2_556 3.374(11) yes
C5 . C7 . 2.514(13) yes
C5 . C11 . 2.475(15) yes
C5 . C38 . 3.586(12) yes
C5 . C39 . 3.485(12) yes
C5 . C44 . 3.557(13) yes
C5 . H10 . 2.619(15) no
C5 . H13 . 0.95(2) no
C5 . H23 . 2.528(13) no
C5 . H24 . 2.577(14) no
C6 . C7 . 1.457(12) yes
C6 . C8 . 2.463(13) yes
C6 . C9 . 2.746(14) yes
C6 . C10 . 2.400(12) yes
C6 . C11 . 1.389(13) yes
C6 . H10 . 2.027(14) no
C6 . H11 . 3.260(13) no
C6 . H13 . 2.041(13) no
C6 . H13 2_556 3.396(12) no
C6 . H17 . 3.528(13) no
C6 . H23 2_556 3.357(13) no
C7 . C8 . 1.454(12) yes
C7 . C9 . 2.441(13) yes
C7 . C10 . 2.874(11) yes
C7 . C11 . 2.487(13) yes
C7 . C12 . 2.590(13) yes
C7 . C13 . 3.089(12) yes
C7 . C14 . 3.134(14) yes
C7 . H10 . 3.336(13) no
C7 . H12 . 3.294(13) no
C7 . H13 . 3.323(13) no
C7 . H13 2_556 3.246(11) no
C7 . H17 . 3.067(12) no
C7 . H23 2_556 3.119(13) no
C7 . H55 . 3.380(14) no
C7 . H56 . 2.837(14) no
C7 . H59 . 2.789(12) no
C7 . H60 . 3.313(13) no
C8 . C9 . 1.386(13) yes
C8 . C10 . 2.468(13) yes
C8 . C11 . 2.821(14) yes
C8 . C12 . 1.546(13) yes
C8 . C13 . 2.530(12) yes
C8 . C14 . 2.529(15) yes
C8 . C15 . 2.549(14) yes
C8 . H11 . 3.317(13) no
C8 . H12 . 2.013(13) no
C8 . H23 2_556 2.825(12) no
C8 . H52 . 2.712(14) no
C8 . H53 . 3.370(15) no
C8 . H54 . 2.729(15) no
C8 . H55 . 2.695(14) no
C8 . H56 . 2.707(15) no
C8 . H57 . 3.350(15) no
C8 . H58 . 3.350(13) no
C8 . H59 . 2.710(13) no
C8 . H60 . 2.699(12) no
C8 . H61 . 3.539(16) no
C8 . H62 . 3.363(16) no
C9 . C10 . 1.404(13) yes
C9 . C11 . 2.364(14) yes
C9 . C12 . 2.569(14) yes
C9 . C14 . 3.596(16) yes
C9 . C15 . 2.847(16) yes
C9 . H10 . 3.227(15) no
C9 . H11 . 2.063(13) no
C9 . H12 . 0.95(7) no
C9 . H22 2_556 3.575(14) no
C9 . H23 2_556 2.791(12) no
C9 . H50 1_546 3.373(16) no
C9 . H52 . 2.707(15) no
C9 . H54 . 2.767(15) no
C9 . H55 . 3.496(16) no
C9 . H60 . 3.557(13) no
C9 . H61 . 3.094(16) no
C9 . H62 . 3.403(16) no
C10 . C11 . 1.357(13) yes
C10 . H10 . 2.000(13) no
C10 . H11 . 0.95(6) no
C10 . H12 . 2.030(13) no
C10 . H22 2_556 3.105(13) no
C10 . H23 2_556 3.055(13) no
C10 . H30 2_556 3.315(14) no
C10 . H61 . 3.124(16) no
C11 . H4 . 3.234(14) no
C11 . H10 . 0.95(4) no
C11 . H11 . 2.017(13) no
C11 . H12 . 3.211(15) no
C11 . H13 . 2.565(14) no
C11 . H23 2_556 3.314(14) no
C11 . H61 . 3.504(18) no
C12 . C13 . 1.526(12) yes
C12 . C14 . 1.537(14) yes
C12 . C15 . 1.555(14) yes
C12 . H12 . 2.696(14) no
C12 . H52 . 2.069(14) no
C12 . H53 . 2.083(14) no
C12 . H54 . 2.073(16) no
C12 . H55 . 2.062(14) no
C12 . H56 . 2.053(15) no
C12 . H57 . 2.063(14) no
C12 . H58 . 2.052(12) no
C12 . H59 . 2.046(12) no
C12 . H60 . 2.049(13) no
C13 . C14 . 2.494(15) yes
C13 . C15 . 2.484(14) yes
C13 . H17 . 3.334(14) no
C13 . H52 . 3.306(15) no
C13 . H53 . 2.661(15) no
C13 . H54 . 2.655(15) no
C13 . H55 . 3.318(15) no
C13 . H56 . 2.664(16) no
C13 . H56 2_656 3.502(15) no
C13 . H57 . 2.667(15) no
C13 . H57 2_656 3.258(16) no
C13 . H58 . 0.95(4) no
C13 . H58 2_656 3.50(2) no
C13 . H59 . 0.95(6) no
C13 . H60 . 0.95(4) no
C13 . H62 . 3.269(17) no
C14 . C15 . 2.514(18) yes
C14 . H23 2_556 3.422(17) no
C14 . H37 2_556 3.488(15) no
C14 . H52 . 2.695(18) no
C14 . H53 . 2.680(18) no
C14 . H54 . 3.334(19) no
C14 . H55 . 0.95(7) no
C14 . H56 . 0.95(7) no
C14 . H57 . 0.95(4) no
C14 . H58 . 2.665(15) no
C14 . H58 2_656 3.262(16) no
C14 . H59 . 2.666(14) no
C14 . H59 2_656 3.502(15) no
C14 . H60 . 3.318(15) no
C15 . H9 1_546 3.051(14) no
C15 . H12 . 2.420(16) no
C15 . H50 1_546 3.586(17) no
C15 . H52 . 0.95(7) no
C15 . H53 . 0.95(4) no
C15 . H54 . 0.95(4) no
C15 . H55 . 2.707(19) no
C15 . H56 . 3.335(18) no
C15 . H57 . 2.667(18) no
C15 . H58 . 2.636(15) no
C15 . H59 . 3.313(15) no
C15 . H60 . 2.661(15) no
C16 . C17 . 1.396(11) yes
C16 . C18 . 2.496(11) yes
C16 . C22 . 2.341(12) yes
C16 . C28 . 3.486(12) yes
C16 . C29 . 3.385(13) yes
C16 . H7 . 2.468(12) no
C16 . H14 . 0.95(3) no
C16 . H14 2_565 3.531(16) no
C16 . H21 . 2.736(13) no
C16 . H22 . 2.524(13) no
C17 . C18 . 1.418(11) yes
C17 . C19 . 2.460(12) yes
C17 . C20 . 2.799(13) yes
C17 . C21 . 2.423(13) yes
C17 . C22 . 1.396(13) yes
C17 . C28 . 3.462(13) yes
C17 . H7 . 2.037(12) no
C17 . H8 . 3.279(13) no
C17 . H14 . 2.000(11) no
C17 . H14 2_565 3.507(12) no
C17 . H21 2_565 3.554(14) no
C18 . C19 . 1.470(11) yes
C18 . C20 . 2.480(12) yes
C18 . C21 . 2.845(12) yes
C18 . C22 . 2.448(12) yes
C18 . C23 . 2.612(12) yes
C18 . C24 . 3.116(13) yes
C18 . C25 . 3.115(14) yes
C18 . H7 . 3.299(12) no
C18 . H9 . 3.336(12) no
C18 . H14 . 3.306(11) no
C18 . H19 . 3.590(13) no
C18 . H43 . 2.807(12) no
C18 . H44 . 3.351(13) no
C18 . H47 . 3.357(15) no
C18 . H48 . 2.788(14) no
C19 . C20 . 1.40(1) yes
C19 . C21 . 2.426(11) yes
C19 . C22 . 2.803(12) yes
C19 . C23 . 1.533(11) yes
C19 . C24 . 2.523(13) yes
C19 . C25 . 2.504(14) yes
C19 . C26 . 2.575(12) yes
C19 . H8 . 3.279(12) no
C19 . H9 . 2.04(1) no
C19 . H43 . 2.696(13) no
C19 . H44 . 2.694(13) no
C19 . H45 . 3.344(13) no
C19 . H46 . 3.332(14) no
C19 . H47 . 2.678(14) no
C19 . H48 . 2.662(15) no
C19 . H49 . 2.774(12) no
C19 . H50 . 2.750(12) no
C19 . H51 . 3.381(12) no
C20 . C21 . 1.377(12) yes
C20 . C22 . 2.392(12) yes
C20 . C23 . 2.542(12) yes
C20 . C25 . 3.574(15) yes
C20 . C26 . 2.841(14) yes
C20 . C32 2_665 3.573(13) yes
C20 . H2 2_665 2.976(13) no
C20 . H7 . 3.245(13) no
C20 . H8 . 2.024(11) no
C20 . H9 . 0.95(7) no
C20 . H12 1_564 3.198(13) no
C20 . H21 2_565 3.350(12) no
C20 . H44 . 3.542(13) no
C20 . H47 . 3.476(15) no
C20 . H49 . 2.769(13) no
C20 . H50 . 2.720(14) no
C20 . H52 1_564 3.032(15) no
C21 . C22 . 1.384(11) yes
C21 . C33 . 3.578(14) yes
C21 . H2 2_665 3.032(13) no
C21 . H7 . 2.028(12) no
C21 . H8 . 0.95(6) no
C21 . H9 . 2.024(12) no
C21 . H21 2_565 2.700(13) no
C21 . H37 2_565 3.413(12) no
C21 . H38 2_565 3.554(12) no
C21 . H39 2_565 3.541(12) no
C21 . H52 1_564 3.288(15) no
C22 . C28 . 3.497(13) yes
C22 . C32 . 3.507(14) yes
C22 . C33 . 3.343(13) yes
C22 . H7 . 0.95(3) no
C22 . H8 . 2.035(12) no
C22 . H9 . 3.249(13) no
C22 . H14 . 2.414(12) no
C22 . H21 2_565 2.820(13) no
C22 . H39 2_565 3.575(13) no
C23 . C24 . 1.538(13) yes
C23 . C25 . 1.552(15) yes
C23 . C26 . 1.559(12) yes
C23 . H9 . 2.669(12) no
C23 . H43 . 2.064(13) no
C23 . H44 . 2.049(15) no
C23 . H45 . 2.067(12) no
C23 . H46 . 2.081(14) no
C23 . H47 . 2.077(15) no
C23 . H48 . 2.060(15) no
C23 . H49 . 2.077(13) no
C23 . H50 . 2.080(12) no
C23 . H51 . 2.079(12) no
C24 . C25 . 2.511(18) yes
C24 . C26 . 2.525(16) yes
C24 . H4 2_566 3.013(14) no
C24 . H5 2_566 3.408(15) no
C24 . H19 . 3.279(15) no
C24 . H43 . 0.95(8) no
C24 . H44 . 0.95(7) no
C24 . H45 . 0.95(3) no
C24 . H46 . 2.689(18) no
C24 . H47 . 3.336(18) no
C24 . H48 . 2.669(18) no
C24 . H49 . 2.707(16) no
C24 . H50 . 3.345(16) no
C24 . H51 . 2.691(16) no
C25 . C26 . 2.503(17) yes
C25 . H29 2_565 3.260(16) no
C25 . H43 . 2.684(18) no
C25 . H44 . 3.329(18) no
C25 . H45 . 2.691(17) no
C25 . H46 . 0.95(3) no
C25 . H46 2_575 3.26(2) no
C25 . H47 . 0.95(6) no
C25 . H47 2_575 3.58(2) no
C25 . H48 . 0.95(8) no
C25 . H49 . 3.331(17) no
C25 . H50 . 2.679(18) no
C25 . H51 . 2.659(16) no
C25 . H61 2_566 3.48(2) no
C25 . H63 2_566 3.56(2) no
C26 . H9 . 2.411(14) no
C26 . H12 1_564 3.440(15) no
C26 . H26 1_565 3.270(14) no
C26 . H32 1_565 3.577(16) no
C26 . H43 . 3.350(16) no
C26 . H44 . 2.710(16) no
C26 . H45 . 2.674(15) no
C26 . H46 . 2.662(17) no
C26 . H47 . 2.689(17) no
C26 . H48 . 3.326(17) no
C26 . H49 . 0.95(6) no
C26 . H50 . 0.95(5) no
C26 . H51 . 0.95(3) no
C27 . C28 . 1.387(12) yes
C27 . C29 . 2.523(12) yes
C27 . C33 . 2.326(12) yes
C27 . H3 . 2.431(11) no
C27 . H15 . 0.95(4) no
C27 . H17 . 3.134(13) no
C27 . H18 . 2.507(12) no
C27 . H19 . 3.021(12) no
C27 . H35 1_655 3.545(13) no
C27 . H36 1_655 3.366(13) no
C27 . H57 2_656 3.455(14) no
C28 . C29 . 1.428(11) yes
C28 . C30 . 2.483(12) yes
C28 . C31 . 2.805(14) yes
C28 . C32 . 2.454(14) yes
C28 . C33 . 1.400(12) yes
C28 . H2 . 3.311(14) no
C28 . H3 . 2.028(11) no
C28 . H7 . 3.514(13) no
C28 . H14 . 3.553(12) no
C28 . H15 . 2.006(11) no
C28 . H53 2_656 2.941(15) no
C29 . C30 . 1.474(12) yes
C29 . C31 . 2.453(12) yes
C29 . C32 . 2.857(12) yes
C29 . C33 . 2.443(11) yes
C29 . C34 . 2.610(12) yes
C29 . C35 . 3.124(13) yes
C29 . C36 . 3.092(13) yes
C29 . H1 . 3.305(13) no
C29 . H3 . 3.291(11) no
C29 . H7 . 3.470(13) no
C29 . H14 . 3.111(12) no
C29 . H15 . 3.335(12) no
C29 . H22 . 3.560(14) no
C29 . H28 . 3.373(13) no
C29 . H30 . 2.803(12) no
C29 . H31 . 2.764(13) no
C29 . H33 . 3.325(14) no
C29 . H53 2_656 3.032(14) no
C30 . C31 . 1.369(11) yes
C30 . C32 . 2.435(12) yes
C30 . C33 . 2.802(12) yes
C30 . C34 . 1.551(12) yes
C30 . C35 . 2.522(12) yes
C30 . C36 . 2.525(13) yes
C30 . C37 . 2.525(13) yes
C30 . H1 . 1.995(12) no
C30 . H2 . 3.285(13) no
C30 . H7 . 3.339(14) no
C30 . H14 . 3.554(13) no
C30 . H25 . 2.703(13) no
C30 . H26 . 3.352(13) no
C30 . H27 . 2.678(13) no
C30 . H28 . 2.681(13) no
C30 . H29 . 3.351(12) no
C30 . H30 . 2.686(13) no
C30 . H31 . 2.687(13) no
C30 . H32 . 3.354(13) no
C30 . H33 . 2.686(14) no
C30 . H53 2_656 3.191(14) no
C31 . C32 . 1.399(12) yes
C31 . C33 . 2.394(13) yes
C31 . C34 . 2.550(13) yes
C31 . C35 . 3.585(13) yes
C31 . C36 . 3.590(13) yes
C31 . C37 . 2.830(14) yes
C31 . H1 . 0.95(4) no
C31 . H2 . 2.055(12) no
C31 . H3 . 3.254(13) no
C31 . H7 . 3.234(13) no
C31 . H9 2_665 3.552(13) no
C31 . H25 . 2.734(14) no
C31 . H27 . 2.697(14) no
C31 . H28 . 3.484(13) no
C31 . H33 . 3.492(14) no
C31 . H38 2_565 3.351(14) no
C31 . H49 2_665 3.524(15) no
C31 . H53 2_656 3.278(15) no
C32 . C33 . 1.397(12) yes
C32 . H1 . 2.038(13) no
C32 . H2 . 0.95(8) no
C32 . H2 2_665 3.292(19) no
C32 . H3 . 2.038(13) no
C32 . H3 2_665 3.586(13) no
C32 . H7 . 3.290(14) no
C32 . H8 . 3.504(14) no
C32 . H8 2_665 3.327(13) no
C32 . H9 2_665 3.104(13) no
C32 . H38 2_565 3.440(14) no
C32 . H52 2_656 3.327(15) no
C32 . H53 2_656 3.229(15) no
C33 . H1 . 3.253(13) no
C33 . H2 . 2.057(12) no
C33 . H2 2_665 3.272(13) no
C33 . H3 . 0.95(3) no
C33 . H7 . 3.413(13) no
C33 . H8 2_665 3.482(12) no
C33 . H15 . 2.408(12) no
C33 . H52 2_656 3.379(15) no
C33 . H53 2_656 3.035(15) no
C34 . C35 . 1.527(13) yes
C34 . C36 . 1.551(14) yes
C34 . C37 . 1.500(13) yes
C34 . H1 . 2.664(14) no
C34 . H25 . 2.024(13) no
C34 . H26 . 2.040(13) no
C34 . H27 . 2.013(14) no
C34 . H28 . 2.037(15) no
C34 . H29 . 2.063(13) no
C34 . H30 . 2.049(14) no
C34 . H31 . 2.067(14) no
C34 . H32 . 2.083(13) no
C34 . H33 . 2.065(16) no
C35 . C36 . 2.521(17) yes
C35 . C37 . 2.451(14) yes
C35 . H11 2_556 3.127(14) no
C35 . H14 . 3.346(14) no
C35 . H22 . 3.381(16) no
C35 . H25 . 3.279(15) no
C35 . H26 . 2.620(14) no
C35 . H27 . 2.623(14) no
C35 . H28 . 0.95(9) no
C35 . H29 . 0.95(3) no
C35 . H30 . 0.95(5) no
C35 . H31 . 2.701(18) no
C35 . H32 . 2.708(17) no
C35 . H33 . 3.334(18) no
C35 . H47 2_565 3.217(15) no
C35 . H48 2_565 3.582(17) no
C35 . H51 1_545 3.510(15) no
C36 . C37 . 2.471(15) yes
C36 . H25 . 2.628(15) no
C36 . H26 . 2.662(16) no
C36 . H27 . 3.294(16) no
C36 . H28 . 3.335(18) no
C36 . H29 . 2.708(17) no
C36 . H30 . 2.700(17) no
C36 . H31 . 0.95(5) no
C36 . H32 . 0.95(3) no
C36 . H33 . 0.95(4) no
C37 . H1 . 2.407(14) no
C37 . H25 . 0.95(4) no
C37 . H25 2_655 3.38(2) no
C37 . H26 . 0.95(3) no
C37 . H27 . 0.95(8) no
C37 . H28 . 2.626(16) no
C37 . H29 . 2.628(14) no
C37 . H30 . 3.275(14) no
C37 . H31 . 3.289(15) no
C37 . H32 . 2.649(15) no
C37 . H33 . 2.653(17) no
C37 . H51 1_545 3.475(14) no
C38 . C39 . 1.460(12) yes
C38 . C40 . 2.546(13) yes
C38 . C44 . 2.416(13) yes
C38 . H4 . 2.533(12) no
C38 . H16 . 0.95(5) no
C38 . H16 2_566 3.358(16) no
C38 . H17 . 2.988(13) no
C38 . H19 . 3.043(13) no
C38 . H20 . 2.401(12) no
C38 . H20 2_566 3.042(12) no
C38 . H24 . 3.452(12) no
C38 . H64 2_566 3.46(7) no
C39 . C40 . 1.456(12) yes
C39 . C41 . 2.484(13) yes
C39 . C42 . 2.770(14) yes
C39 . C43 . 2.410(13) yes
C39 . C44 . 1.365(12) yes
C39 . H4 . 2.000(12) no
C39 . H5 . 3.264(13) no
C39 . H13 . 3.283(12) no
C39 . H16 . 2.065(12) no
C39 . H20 2_566 2.942(12) no
C39 . H24 . 2.945(13) no
C39 . H64 2_566 3.44(7) no
C40 . C41 . 1.473(11) yes
C40 . C42 . 2.450(14) yes
C40 . C43 . 2.862(12) yes
C40 . C44 . 2.453(12) yes
C40 . C45 . 2.590(13) yes
C40 . C46 . 3.108(13) yes
C40 . C47 . 3.105(14) yes
C40 . H4 . 3.303(13) no
C40 . H6 . 3.304(14) no
C40 . H16 . 3.353(13) no
C40 . H20 2_566 3.461(12) no
C40 . H24 . 2.601(12) no
C40 . H37 . 3.372(13) no
C40 . H39 . 2.790(12) no
C40 . H40 . 2.783(13) no
C40 . H42 . 3.386(14) no
C40 . H64 2_566 2.79(7) no
C41 . C42 . 1.377(13) yes
C41 . C43 . 2.447(13) yes
C41 . C44 . 2.804(14) yes
C41 . C45 . 1.546(13) yes
C41 . C46 . 2.556(12) yes
C41 . C47 . 2.513(14) yes
C41 . C48 . 2.531(13) yes
C41 . H5 . 3.297(13) no
C41 . H6 . 2.005(13) no
C41 . H24 . 3.219(14) no
C41 . H34 . 2.699(14) no
C41 . H35 . 3.351(14) no
C41 . H36 . 2.709(13) no
C41 . H37 . 2.744(12) no
C41 . H38 . 3.370(13) no
C41 . H39 . 2.725(12) no
C41 . H40 . 2.680(13) no
C41 . H41 . 3.333(14) no
C41 . H42 . 2.694(14) no
C42 . C43 . 1.395(14) yes
C42 . C44 . 2.372(15) yes
C42 . C45 . 2.574(15) yes
C42 . C48 . 2.862(16) yes
C42 . H4 . 3.230(15) no
C42 . H5 . 2.054(14) no
C42 . H6 . 0.95(3) no
C42 . H34 . 2.742(16) no
C42 . H34 2_466 3.038(15) no
C42 . H36 . 2.766(15) no
C42 . H37 . 3.570(14) no
C42 . H42 . 3.521(15) no
C42 . H42 2_466 3.366(16) no
C43 . C44 . 1.377(12) yes
C43 . H4 . 2.013(14) no
C43 . H5 . 0.95(8) no
C43 . H6 . 2.026(14) no
C43 . H10 . 3.510(15) no
C43 . H13 . 3.523(14) no
C43 . H34 2_466 3.267(15) no
C43 . H42 2_466 3.582(15) no
C43 . H45 2_566 3.396(15) no
C44 . H4 . 0.95(8) no
C44 . H5 . 2.038(12) no
C44 . H6 . 3.226(15) no
C44 . H10 . 3.244(14) no
C44 . H13 . 3.166(12) no
C44 . H16 . 2.558(13) no
C44 . H19 2_566 3.567(12) no
C44 . H20 2_566 3.252(12) no
C44 . H43 2_566 3.375(14) no
C44 . H45 2_566 3.272(14) no
C45 . C46 . 1.553(13) yes
C45 . C47 . 1.524(13) yes
C45 . C48 . 1.525(13) yes
C45 . H6 . 2.707(16) no
C45 . H34 . 2.047(14) no
C45 . H35 . 2.053(13) no
C45 . H36 . 2.044(13) no
C45 . H37 . 2.073(12) no
C45 . H38 . 2.074(13) no
C45 . H39 . 2.071(13) no
C45 . H40 . 2.052(13) no
C45 . H41 . 2.046(13) no
C45 . H42 . 2.045(13) no
C46 . C47 . 2.507(13) yes
C46 . C48 . 2.474(14) yes
C46 . H3 1_455 3.508(13) no
C46 . H7 2_565 3.522(13) no
C46 . H8 2_565 2.904(12) no
C46 . H24 . 3.389(14) no
C46 . H34 . 3.306(14) no
C46 . H35 . 2.636(14) no
C46 . H36 . 2.637(14) no
C46 . H37 . 0.95(4) no
C46 . H38 . 0.95(8) no
C46 . H39 . 0.95(4) no
C46 . H40 . 2.707(13) no
C46 . H41 . 2.649(14) no
C46 . H42 . 3.330(14) no
C46 . H55 2_556 3.531(15) no
C47 . C48 . 2.477(14) yes
C47 . H27 2_565 3.482(16) no
C47 . H34 . 2.662(15) no
C47 . H35 . 2.641(14) no
C47 . H36 . 3.299(14) no
C47 . H37 . 3.327(14) no
C47 . H38 . 2.666(13) no
C47 . H39 . 2.699(14) no
C47 . H40 . 0.95(4) no
C47 . H41 . 0.95(8) no
C47 . H42 . 0.95(4) no
C47 . H64 2_566 3.49(7) no
C48 . H6 . 2.454(16) no
C48 . H15 1_455 3.003(13) no
C48 . H18 1_455 3.180(15) no
C48 . H34 . 0.95(4) no
C48 . H35 . 0.95(8) no
C48 . H36 . 0.95(4) no
C48 . H37 . 2.644(14) no
C48 . H38 . 2.643(14) no
C48 . H39 . 3.301(14) no
C48 . H40 . 3.304(14) no
C48 . H41 . 2.645(15) no
C48 . H42 . 2.646(14) no
C49 . H16 . 3.37(2) no
C49 . H17 . 3.414(18) no
C49 . H40 2_566 3.213(18) no
C49 . H48 2_566 3.25(2) no
C49 . H60 . 3.336(17) no
C49 . H61 . 0.95(6) no
C49 . H62 . 0.95(7) no
C49 . H63 . 0.95(3) no
C49 . H64 . 1.74(7) no

#==============================================================================

# Additional structures and associated data_? identifiers
# should be added at this point if there is more than one 
# structure analysis in the CIF.

#==============================================================================

#     End of CIF
